# Supplementary material
Source: PubMed Central journal article supplement (PMC10560492)
Supplement: NIHMS1932258-supplement-Supp_Info.pdf [file NIHMS1932258-supplement-Supp_Info.pdf]

# Supporting Information

## Base Editor Scanning Reveals Activating Mutations of DNMT3A

Emma M. Garcia<sup>1,2</sup>, Nicholas Z. Lue<sup>1,2</sup>, Jessica K. Liang<sup>1</sup>, Whitney K. Lieberman<sup>1</sup>, Derek D. Hwang<sup>1</sup>, James Woods<sup>1,2</sup>, Brian B. Liao<sup>\*1,2</sup>

### **Affiliations:**

<sup>1</sup>Department of Chemistry and Chemical Biology, Harvard University, Cambridge, MA, USA

<sup>2</sup>Broad Institute of Harvard and MIT, Cambridge, MA, USA

# Table of Contents

## Supplementary Figures:

1. Figure S1: Pie chart and allele table showing targeted deep sequencing of R882 codon of *DNMT3A* in *DNMT3A*<sup>WT/R882H</sup> cells.
2. Figure S2: Silencing dynamics of dDNMT3A reporter system, representative gating scheme, and additional plots associated with Figure 1.
3. Figure S3: Western blot of reporter cells transduced with base editing sgRNAs.
4. Figure S4: Additional sgRNAs tested.
5. Figure S5: Genotyping of *DNMT3A*<sup>WT/R882H</sup> cells treated with sgRNAs.
6. Figure S6: D618\_K621del mutation is found in colobinae monkeys.
7. Figure S7: Additional *in vitro* validation of DNMT3A variants.

## Supplementary Tables:

1. Table S1: Plasmids constructed in this study.
2. Table S2: Primers and oligos used in this study.
3. Table S3: Melting temperatures of recombinant DNMT3A2 variants by DSF
4. Table S4: *DNMT3A*<sup>WT</sup> cell line screen results. (separate xlsx)
5. Table S5: *DNMT3A*<sup>WT/R882H</sup> cell line screen results. (separate xlsx)
6. Table S6: Additional data on activating guides. (separate xlsx)

Genotyping of *DNMT3A* R882 locus for clonal *DNMT3A*<sup>WT/R882H</sup> cell line

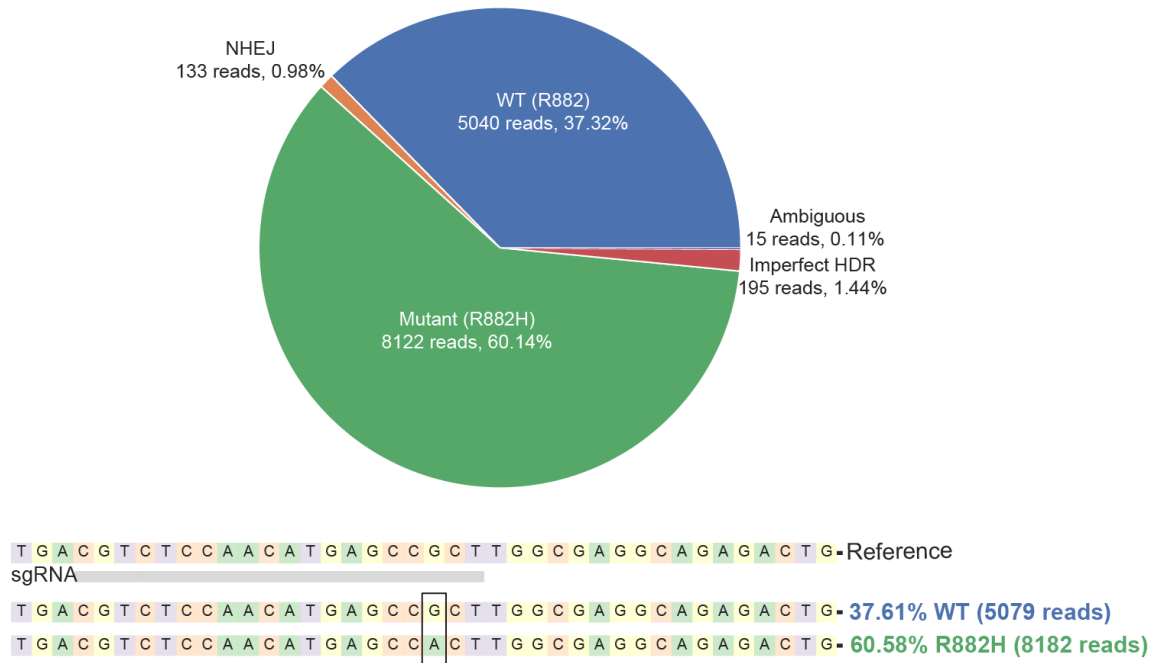

**Figure S1: Pie chart and allele table showing targeted deep sequencing of R882 codon of *DNMT3A* in *DNMT3A*<sup>WT/R882H</sup> cells.** K562 cells are triploid, and these genotyping results are consistent with our cell line containing 2 copies of *DNMT3A*<sup>R882H</sup> and one copy of *DNMT3A*<sup>WT</sup>. sequences of WT and R882H reads are shown below. Plots generated with CRISPResso2.

**a. Silencing of citrine reporter with dox treatment**

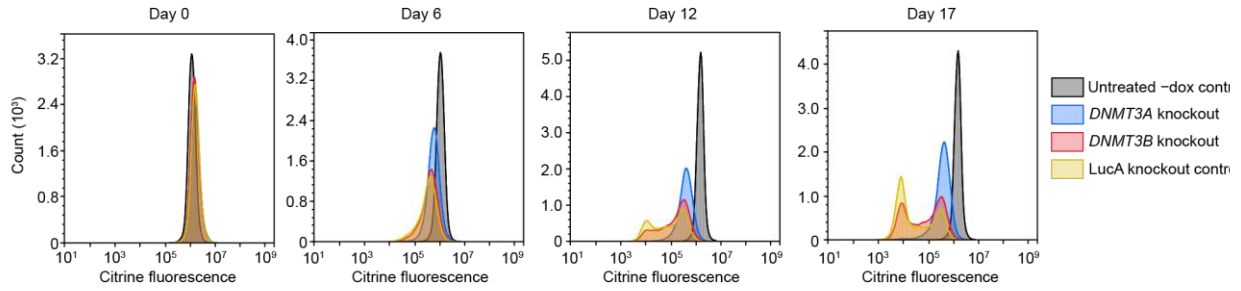

**b. Representative gating scheme**

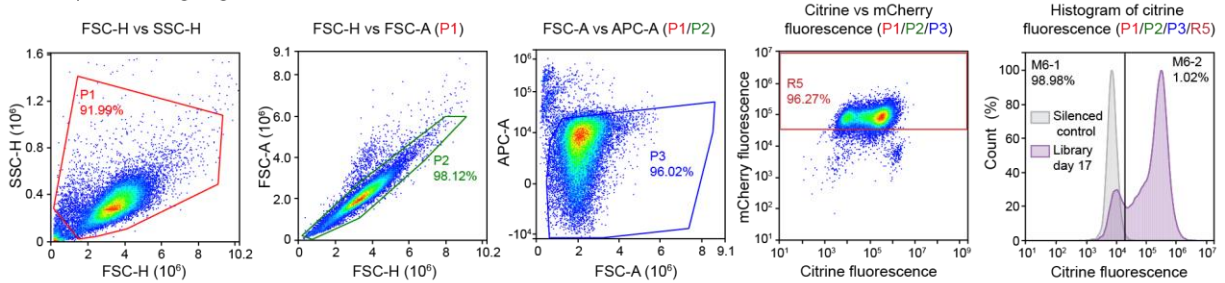

**c. Figure 1c percent citrine negative day 18**

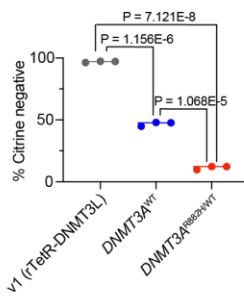

**d. Figure 1d percent citrine negative**

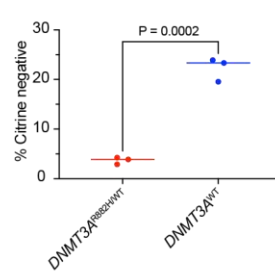

**e. Figure 1e percent citrine negative day 36**

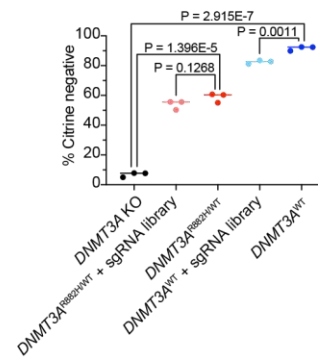

**Figure S2: Silencing dynamics of dDNMT3A reporter system, representative gating scheme, and additional plots associated with Figure 1.**

- Histograms of  $DNMT3A^{WT}$  reporter cells treated with  $DNMT3A$  knockout,  $DNMT3B$  knockout, or LucA knockout (control) sgRNAs and Cas9 after 0, 6, 12, and 17 days of 1  $\mu\text{g}/\text{mL}$  doxycycline treatment.
- Representative gating scheme for sorting cells in our screen. Events were first gated for morphologically typical K562 cells, then for events corresponding to single cells. Then, helix-IR staining was used to gate out dead cells. Finally, the population corresponding to healthy, single cells was gated for mCherry+ cells and assessed for citrine fluorescence. Cells were sorted based on a citrine gate where ~1% of fully silenced control cells are citrine+.
- Plot of day 18 percent citrine negative cells from Figure 1c. P-values were calculated from two-sided student's t-tests.
- Plot of percent citrine negative cells from Figure 1d. P-value was calculated from a two-sided student's t-test.
- Plot of day 36 percent citrine negative cells from Figure 1e. P-values were calculated from two-sided student's t-tests.

Expression of DNMT3A in *DNMT3A*<sup>WT/R882H</sup> cells treated with sgRNAs

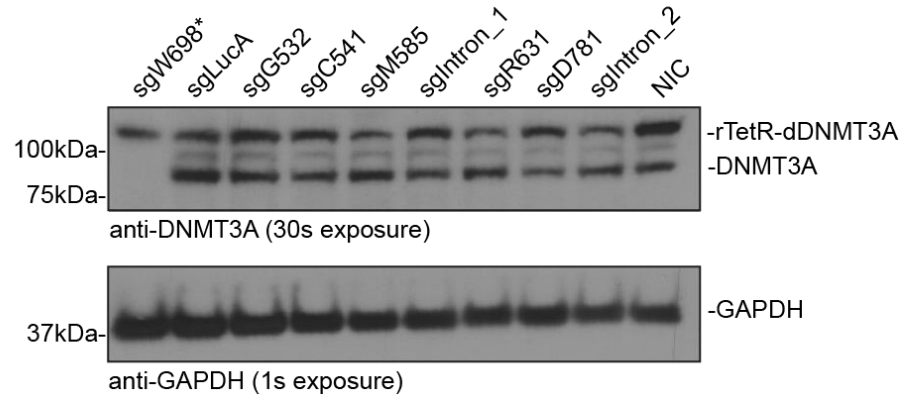

**Figure S3: Western Blot of reporter cells transduced with base editing sgRNAs.** sgW698\* causes depletion of endogenous DNMT3A levels but not rTetR-dDNMT3A levels. Other sgRNAs tested (the same set as used in Figure 3b) do not dramatically affect protein expression levels.

a. Reporter silencing in *DNMT3A*<sup>WT</sup> cells transduced with sgRNAs, day 12 +dox

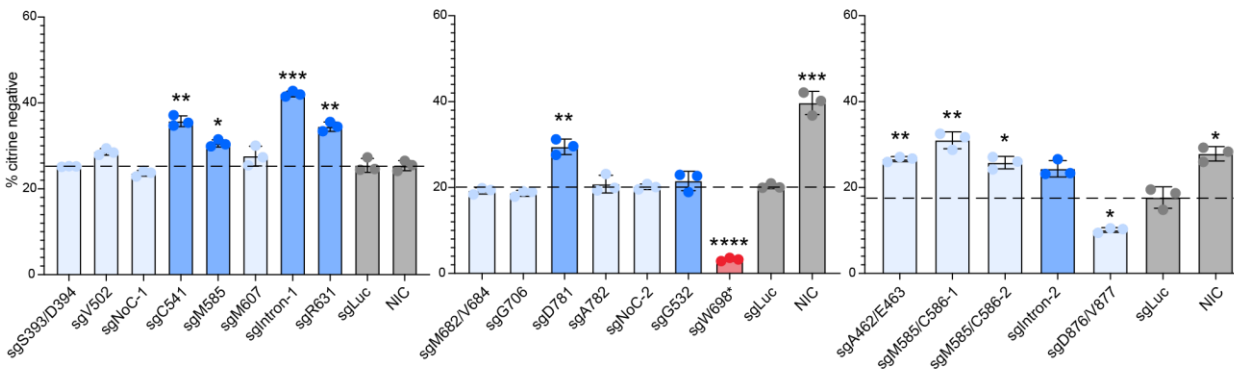

b. Reporter silencing in *DNMT3A*<sup>WT/R882H</sup> cells transduced with sgRNAs, day 18 +dox

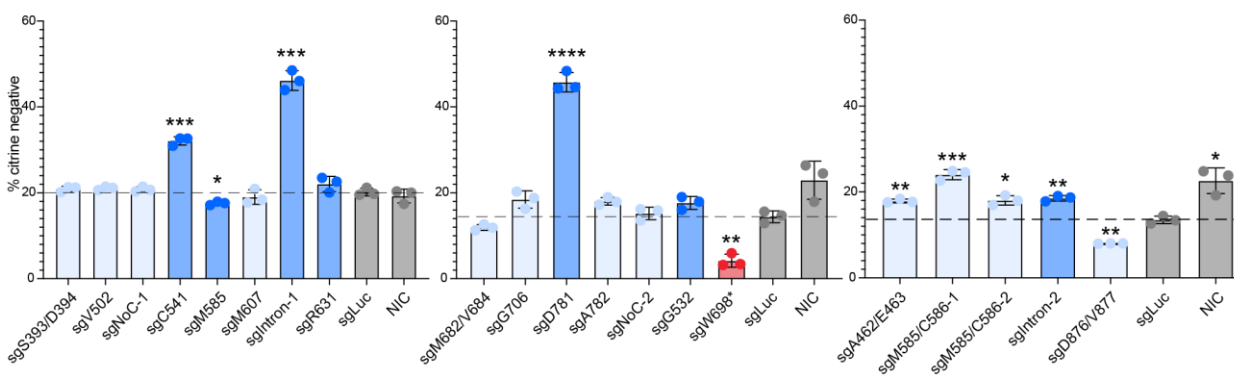

**Figure S4: Additional sgRNAs tested.**

- Bar plots showing % silenced *DNMT3A*<sup>WT</sup> cells treated with sgRNAs after 12 days of dox treatment. LucA = Luciferase targeting sgRNA, NIC = Non-infection control. Dark blue, red and gray bars indicate biological replicates for guides shown in Figure 3b, and light blue bars indicate one biological replicate in technical triplicate for additional sgRNAs. Data are mean  $\pm$  SD of n = 3 replicates. Stars correspond to significance testing after two-sided students t-tests comparing each guide to sgLuc with Bonferroni multiple hypothesis correction. See Table S6 for a summary of all single guides tested.
- Bar plots showing % silenced *DNMT3A*<sup>WT/R882H</sup> cells after 18 days of dox treatment. Data are mean  $\pm$  SD of n = 3 replicates. Stars correspond to significance testing after two-sided Students t-tests comparing each guide to sgLuc with Bonferroni multiple hypothesis correction. See table S6 for a summary of all single guides tested.

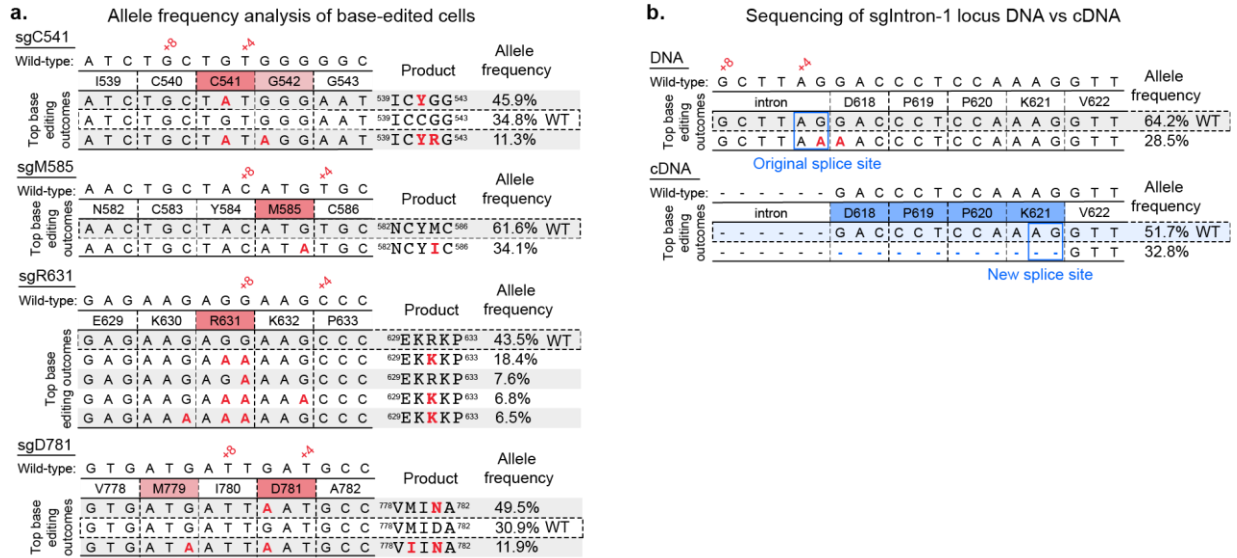

**Figure S5: Genotyping of *DNMT3A*<sup>WT/R882H</sup> cells treated with sgRNAs.**

- Tables showing base editing outcomes with >5% allele frequency from treatment of *DNMT3A*<sup>WT/R882H</sup> reporter cells with single missense sgRNAs.
- Scheme showing genomic DNA and transcript cDNA sequencing of cells treated with sgIntron-1.

### Alignment of human and colobinae monkey DNMT3A

| Organism/sequence                                       | Translation                                          |
|---------------------------------------------------------|------------------------------------------------------|
| Human DNMT3A (Q9Y6K1):                                  | 610 <b>A N N H D Q E F D P P K V Y P P V P A</b> 628 |
| Translation of D618_K621del:                            | A N N H D Q E F - - - - V Y P P V P A                |
| Rhinopithecus bieti (Black snub-nosed monkey):          | A N N H D Q E F - - - - V <b>S A G P G</b> A         |
| Rhinopithecus roxellana (Golden snub-nosed monkey):     | A N N H D Q E F - - - - V <b>S A G P G</b> A         |
| Colobus angolensis palliatus (Peters' Angolan colobus): | A N N H D Q E F - - - - V <b>S A G P G</b> A         |

#### Overall sequence identity

|                   | Human | Black snub-nosed | Golden snub-nosed | Peters' Angolan |
|-------------------|-------|------------------|-------------------|-----------------|
| Human             | 100%  | 96.8%            | 96.8%             | 95.3%           |
| Black snub-nosed  | 96.8% | 100%             | 100%              | 98.1%           |
| Golden snub-nosed | 96.8% | 100%             | 100%              | 98.1%           |
| Peters' Angolan   | 95.3% | 98.1%            | 98.1%             | 100%            |

**Figure S6: D618\_K621del mutation is found in colobinae monkeys.** Despite additional local variation in sequence between human and colobinae DNMT3A, the proteins are overall very similar. UniProt IDs: A0A2K6PNQ5\_RHIRO, A0A2K6KW24\_RHIBE, A0A2K5JG23\_COLAP



a. SDS-PAGE gel of purified DNMT3A2 variants

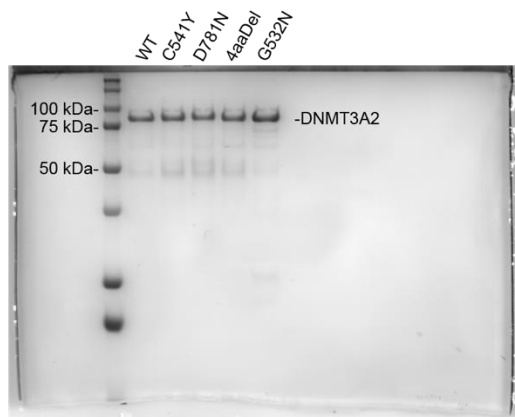

b. Replicate 2 DNMT3A mutant activation + H3K4me0

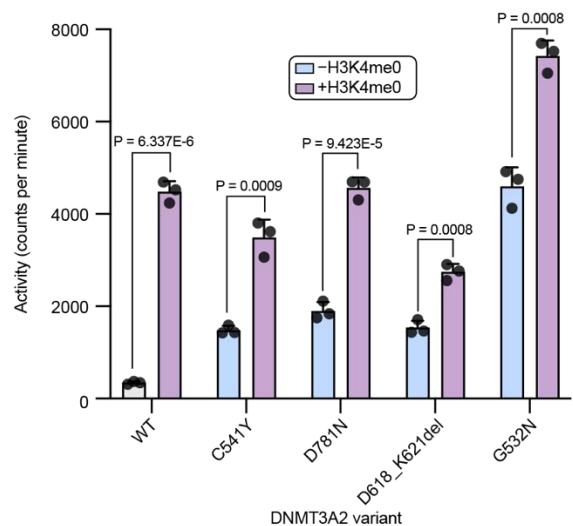

**Figure S7: Additional *in vitro* validation of DNMT3A variants.**

- SDS-PAGE gel showing purified DNMT3A2 variants used in Figure 4.
- Second replicate of activity assay shown in Figure 4b. Data are mean  $\pm$  SD of  $n = 3$  replicates. P-values were calculated by unpaired two-tailed Students' T-tests. P-values for no peptide mutant comparisons are as follows: WT vs C541Y =  $3.877E-5$ , WT vs D781N = 0.0001, WT vs D618\_K621del = 0.0002, WT vs G532N =  $6.012E-5$ .

**Table S1: Plasmids constructed in this study.**

| <b>Application</b>                 | <b>Plasmid</b>                          | <b>Description</b>                                    |
|------------------------------------|-----------------------------------------|-------------------------------------------------------|
| Base editing screen and validation | pEF-H2B-mCherry-T2A-rTetR-dDNMT3A2      | Lentiviral, mammalian expression of updated reporter  |
| Bacterial Protein Expression       | pET28b-His <sub>6</sub> -DNMT3A2-C541Y  | Expression of His <sub>6</sub> -tagged DNMT3A2 C541Y  |
|                                    | pET28b-His <sub>6</sub> -DNMT3A2-D781N  | Expression of His <sub>6</sub> -tagged DNMT3A2 D781N  |
|                                    | pET28b-His <sub>6</sub> -DNMT3A2-4aaDel | Expression of His <sub>6</sub> -tagged DNMT3A2 4aaDel |

**Table S2: Primers and oligos used in this study.**

| <b>Application</b>                                | <b>Description</b>                                              | <b>Sequence</b>                                    |
|---------------------------------------------------|-----------------------------------------------------------------|----------------------------------------------------|
| Plasmid Construction                              | Construction of pET28b-His <sub>6</sub> -DNMT3A2-D781N Forward  | CTTCCTTCGCATTGATCATAACCG                           |
|                                                   | Construction of pET28b-His <sub>6</sub> -DNMT3A2-D781N Reverse  | CGGTTATGATCAATGCGAAGGAAG                           |
|                                                   | Construction of pET28b-His <sub>6</sub> -DNMT3A2-4aaDel Forward | GGTGGATACACAAATTCTTGGTCATGG                        |
|                                                   | Construction of pET28b-His <sub>6</sub> -DNMT3A2-4aaDel Reverse | GGTGGATACACAAATTCTTGGTCATGG                        |
|                                                   | Construction of pET28b-His <sub>6</sub> -DNMT3A2-C541Y Forward  | CCTCACGACCGCCATAGCAAATCGTAC                        |
|                                                   | Construction of pET28b-His <sub>6</sub> -DNMT3A2-C541Y Reverse  | GTACGATTTGCTATGGCGGTCGTGAGG                        |
|                                                   | Construction of pEF-H2B-mCherry-T2A-rTetR-dDNMT3A2 Forward      | CCTTTTTTTTTGGCTCTTTGCGAACGTCGTCGCTATGGGAG          |
|                                                   | Construction of pEF-H2B-mCherry-T2A-rTetR-dDNMT3A2 Reverse      | CTCCCATAGCGACGACGTTTCGCAAAAGGCCAAAAAAAAGG          |
| Individual sgRNAs (top= Forward, bottom= Reverse) | DNMT3A2_552                                                     | CACCGGGCATCAATCATCACAGGGTAAACACCCTGTGATGATTGATGCC  |
|                                                   | DNMT3A2_414                                                     | CACCGTCCTAAGCAGTGAGCACAACAAACGTTGTGCTCACTGCTTAGGAC |
|                                                   | DNMT3A2_207                                                     | CACCGTGTCACTCTCATCGCTGTCGAAACCGACAGCGATGAGAGTGACAC |
|                                                   | DNMT3A2_341                                                     | CACCGAGCAGATGGTGCAGTAGGACAAACGTCCTACTGCACCATCTGCTC |
|                                                   | DNMT3A2_617                                                     | CACCGCATCTTATGGTGCCTGAAAAACTTTTCAGTGCACCATAAGATGC  |
|                                                   | DNMT3A2_310                                                     | CACCGGGTAACATTGAGGCTCCCACAAACGTGGGAGCCTCAATGTTACCC |
|                                                   | DNMT3A2_396                                                     | CACCGAAGAACATCTGGAGCCGGGAAACTCCCAGCTCCAGATGTTCTTC  |
|                                                   | DNMT3A2_493                                                     | CACCGCCCCAATCACCAGATCGAATAAACATTCGATCTGGTGATTGGGGC |
|                                                   | DNMT3A2_554                                                     | CACCGTCTTTGGCATCAATCATCACAAACGTGATGATTGATGCCAAAGAC |
|                                                   | DNMT3A2_381                                                     | CACCGCGCACATGTAGCAGTTCCAGAAACCTGGAAGTGTACATGTGCGC  |
|                                                   | DNMT3A2_422                                                     | CACCGTGGGCTTCTCTTCTCAGCTAAACAGCTGAGAAGAGGAAGCCCAC  |
| DNMT3A2_343                                       | CACCGCCCACAGCAGATGGTGCAGTAAACACTGCACCATCTGCTGTGGGC              |                                                    |

|                                             |                                         |                                                                                                                   |
|---------------------------------------------|-----------------------------------------|-------------------------------------------------------------------------------------------------------------------|
|                                             | DNMT3A2_613                             | CACCGTCATGAAGACAGGAAAATGC<br>AAACGCATTTTCCTGTCTTCATGAC                                                            |
|                                             | DNMT3A2_468                             | CACCGCGACGTACATGATCTTCCCC<br>AAACGGGGAAGATCATGTACGTCGC                                                            |
|                                             | DNMT3A_260                              | CACCGTTCTCCGCTGTGCTCTTCCG<br>AAACCGGAAGAGCACAGCGGAGAAC                                                            |
|                                             | DNMT3A_382                              | CACCGCCGCACATGTAGCAGTTCCA<br>AAACTGGAAGTACTACATGTGCGGC                                                            |
|                                             | DNMT3A_384                              | CACCGCCCGCACATGTAGCAGTTCC<br>AAACGGAACTGCTACATGTGCGGGC                                                            |
|                                             | DNMT3A_568                              | CACCGTTTCACCAACCTGTTCATAC<br>AAACGTATGAACAGGTTGGTGAAAC                                                            |
| R882H Knock-in                              | sgRNA for CRISPR-Cas9<br>R882H knock-in | CCAACATGAGCCGCTTGGCG                                                                                              |
|                                             | HDR template for R882H<br>knock-in      | CAGGGTATTTGGTTTCCCAGTCCACT<br>ATACTGACGTCTCCAACATGAGCCAC<br>TTGGCGAGGCAGAGACTGCTGGGCC<br>GGTCATGGAGCGTGCCAGTCATCC |
| Genotyping<br>(bold=gDNA<br>binding region) | pNL1.155 F3-sequence<br>around R882     | ACACTCTTTCCCTACACGACGCTCTT<br>CCGATCTNNNNCAGCACTCACCTG<br><b>CCC</b>                                              |
|                                             | pNL1.155 R3-sequence<br>around R882     | TGGAGTTCAGACGTGTGCTCTTCCGA<br><b>TCTTCGCTACCTCAGTTTGCCC</b>                                                       |
|                                             | pNL1.175 F1-sequence<br>around G532     | ACACTCTTTCCCTACACGACGCTCTT<br>CCGATCTNNNNTCCTGGTGGTTTCT<br><b>GACCCT</b>                                          |
|                                             | pNL1.175 R1-sequence<br>around G532     | TGGAGTTCAGACGTGTGCTCTTCCGA<br><b>TCTCCAAGGTGTGCTACCTGGAA</b>                                                      |
|                                             | pEG1.103 3F-sequence exon<br>10         | TGGAGTTCAGACGTGTGCTCTTCCGA<br><b>TCTGCCCTCCAGCCAGGCTCCTA</b>                                                      |
|                                             | pEG1.103 3R-sequence exon<br>10         | ACACTCTTTCCCTACACGACGCTCTT<br>CCGATCTNNNNTTGCGTGGAGTGTG<br><b>TGGACCT</b>                                         |
|                                             | pEG1.103 4F-sequence exon<br>11         | TGGAGTTCAGACGTGTGCTCTTCCGA<br><b>TCTCCATCCTGGGACAAGGCGG</b>                                                       |
|                                             | pEG1.103 4R-sequence exon<br>11         | ACACTCTTTCCCTACACGACGCTCTT<br>CCGATCTNNNNGGTTGTGGGGCCT<br><b>GAGCTGT</b>                                          |
|                                             | pNL1.243 F4- sequence exon<br>11        | TGGAGTTCAGACGTGTGCTCTTCCGA<br><b>TCTGTGGGAGCTTGGGACACC</b>                                                        |
|                                             | pNL1.243 R4- sequence exon<br>11        | ACACTCTTTCCCTACACGACGCTCTT<br>CCGATCTNNNNCAGCACCTCTTGGG<br><b>CCTG</b>                                            |
|                                             | pNL1.243 F6- sequence exon<br>15        | TGGAGTTCAGACGTGTGCTCTTCCGA<br><b>TCTAGTGTGTGGCTCCTGAGAGA</b>                                                      |

|                                            |                                                                           |
|--------------------------------------------|---------------------------------------------------------------------------|
| pNL1.243 R6.2- sequence<br>exon 15         | ACACTCTTTCCCTACACGACGCTCTT<br>CCGATCTNNNNCTATGGGTCATCCC<br><b>ACCTGC</b>  |
| pEG1.136 1F- sequence<br>around sgIntron-1 | ACACTCTTTCCCTACACGACGCTCTT<br>CCGATCTNNNNATCAAAGAGAGACA<br><b>GCACCCG</b> |
| pEG1.136 1R- sequence<br>around sgIntron-1 | TGGAGTTCAGACGTGTGCTCTTCCGA<br>TCTGGGCACAAGGGTACCTACG                      |

**Table S3: Melting temperatures of recombinant DNMT3A2 variants by DSF**

| <b>Variant</b> | <b>Replicate 1 (°C)</b> | <b>Replicate 2 (°C)</b> |
|----------------|-------------------------|-------------------------|
| DNMT3A2_WT     | 43.4 ± 0.1              | 43.2 ± 0.1              |
| DNMT3A2_C541Y  | 44.5 ± 0.2              | 44.1 ± 0.0              |
| DNMT3A2_D781N  | 43.9 ± 0.1              | 43.9 ± 0.0              |
| DNMT3A2_4aaDel | 45.8 ± 1.0              | 43.2 ± 0.1              |
| DNMT3A2_G532N  | 45.1 ± 0.2              | 44.7 ± 0.2              |
